# Supplementary material
Source: PubMed Central journal article supplement (PMC5847420)
Supplement: NIHMS908805-supplement-Supp_info.pdf [file NIHMS908805-supplement-Supp_info.pdf]

Supplementary table 1: Rare, homozygous, predicted pathogenic exonic variants identified in patient 1 DNA.

| <b>chr</b> | <b>bp</b> | <b>ref</b> | <b>mut</b> | <b>gene</b> | <b>AA change</b> |
|------------|-----------|------------|------------|-------------|------------------|
| 1          | 175129955 | G          | T          | KIAA0040    | N-65-K           |
| 2          | 48808095  | C          | A          | STON1       | S-108-*          |
| 3          | 136240051 | T          | C          | STAG1       | splice site      |
| 3          | 142987754 | G          | A          | SLC9A9      | P-558-L          |
| 4          | 120177605 | C          | T          | USP53       | R-166-C          |
| 11         | 12901385  | C          | G          | TEAD1       | P-154-R          |
| 11         | 20066981  | G          | A          | NAV2        | A-1159-T         |
| 12         | 14947485  | T          | C          | WBP11       | Y-236-C          |
| 15         | 65342421  | T          | -          | SLC51B      | F-27-F           |
| 16         | 175076    | A          | -          | NPRL3       | splice site      |
| 19         | 8564466   | C          | A          | PRAM1       | V-76-F           |
| X          | 38013815  | G          | A          | SRPX        | L-351-F          |
| X          | 50213149  | G          | A          | DGKK        | P-177-S          |
| X          | 106070571 | A          | G          | TBC1D8B     | splice site      |
| X          | 134707883 | A          | G          | DDX26B      | Y-509-C          |

Supplementary table 2: All *SLC51A* (OST $\alpha$ ) and *SLC51B* (OST $\beta$ ) variants identified in patient 1 DNA.

The sequences was compared to the following Ensembl Identifiers for *SLC51A* (gene identifier: ENSG00000163959; transcript identifier: ENST00000296327; protein identifier: ENSP00000296327) and *SLC51B* (gene identifier: ENSG00000186198; transcript identifier: ENST00000334287; protein identifier: ENSP00000335292).

| Chromosome | Position  | Gene          | Reference | Allele | Zygosity | dbSNP      | Effect                        | 1kg_MAF    | Location |          |               |                 |                  |
|------------|-----------|---------------|-----------|--------|----------|------------|-------------------------------|------------|----------|----------|---------------|-----------------|------------------|
|            |           |               |           |        |          |            |                               |            | Exon     | Intron   | cDNA Sequence | Coding Sequence | Protein Sequence |
| 3          | 195941216 | <b>SLC51A</b> | C         | G      | Hom      | rs7642243  | Upstream gene variant         | 0.3264 (C) |          |          |               |                 |                  |
| 3          | 195943481 | <b>SLC51A</b> | C         | T      | Hom      | rs56030157 | 5' prime UTR variant          | 0.2319 (T) | 1 (of 9) |          | 107           |                 |                  |
| 3          | 195950608 | <b>SLC51A</b> | T         | A      | Het      | .          | Intron variant                |            |          | 2 (of 8) |               |                 |                  |
|            |           |               |           |        |          |            |                               |            |          |          |               |                 |                  |
| 15         | 65342420  | <b>SLC51B</b> | GT        | -      | Hom      | .          | Frameshift variant truncation |            | 2 (of 4) |          | 400           | 79              | 27               |
| 15         | 65344035  | <b>SLC51B</b> | G         | A      | Hom      | rs2946676  | Intron variant                | 0.0937 (G) |          | 3 (of 3) |               |                 |                  |
